# Supplementary material
Source: PubMed Central journal article supplement (PMC10832386)

Supp. Figure 1

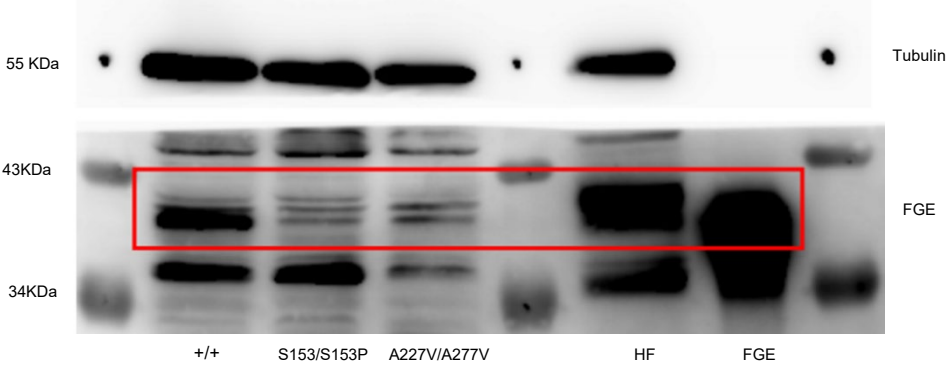

Supp. Figure 2

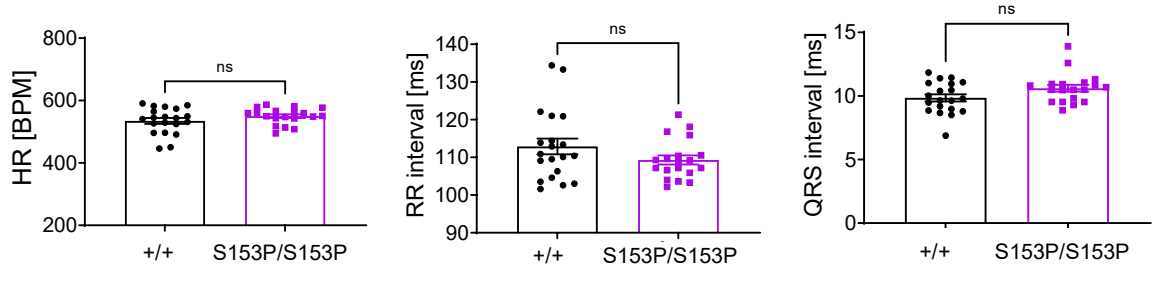

Supp. Figure 3

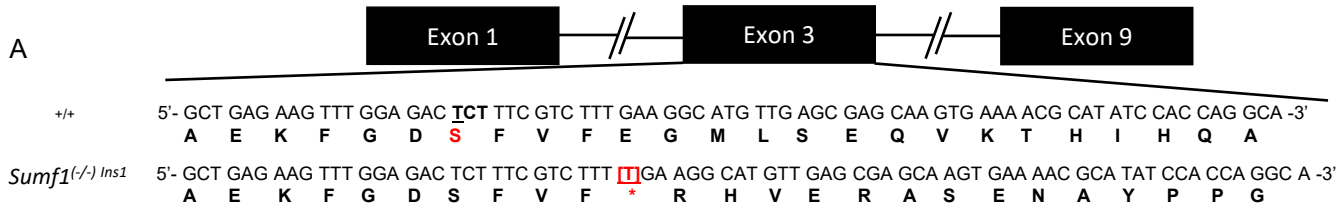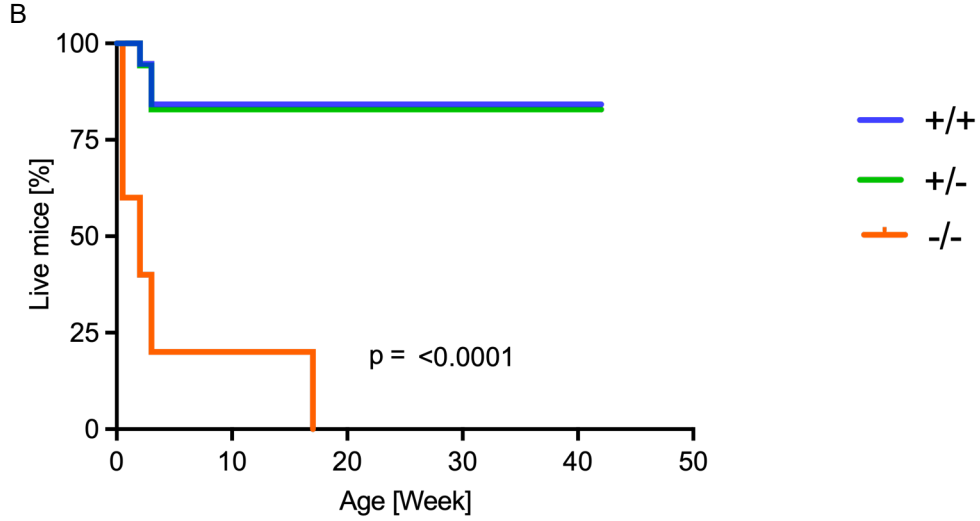

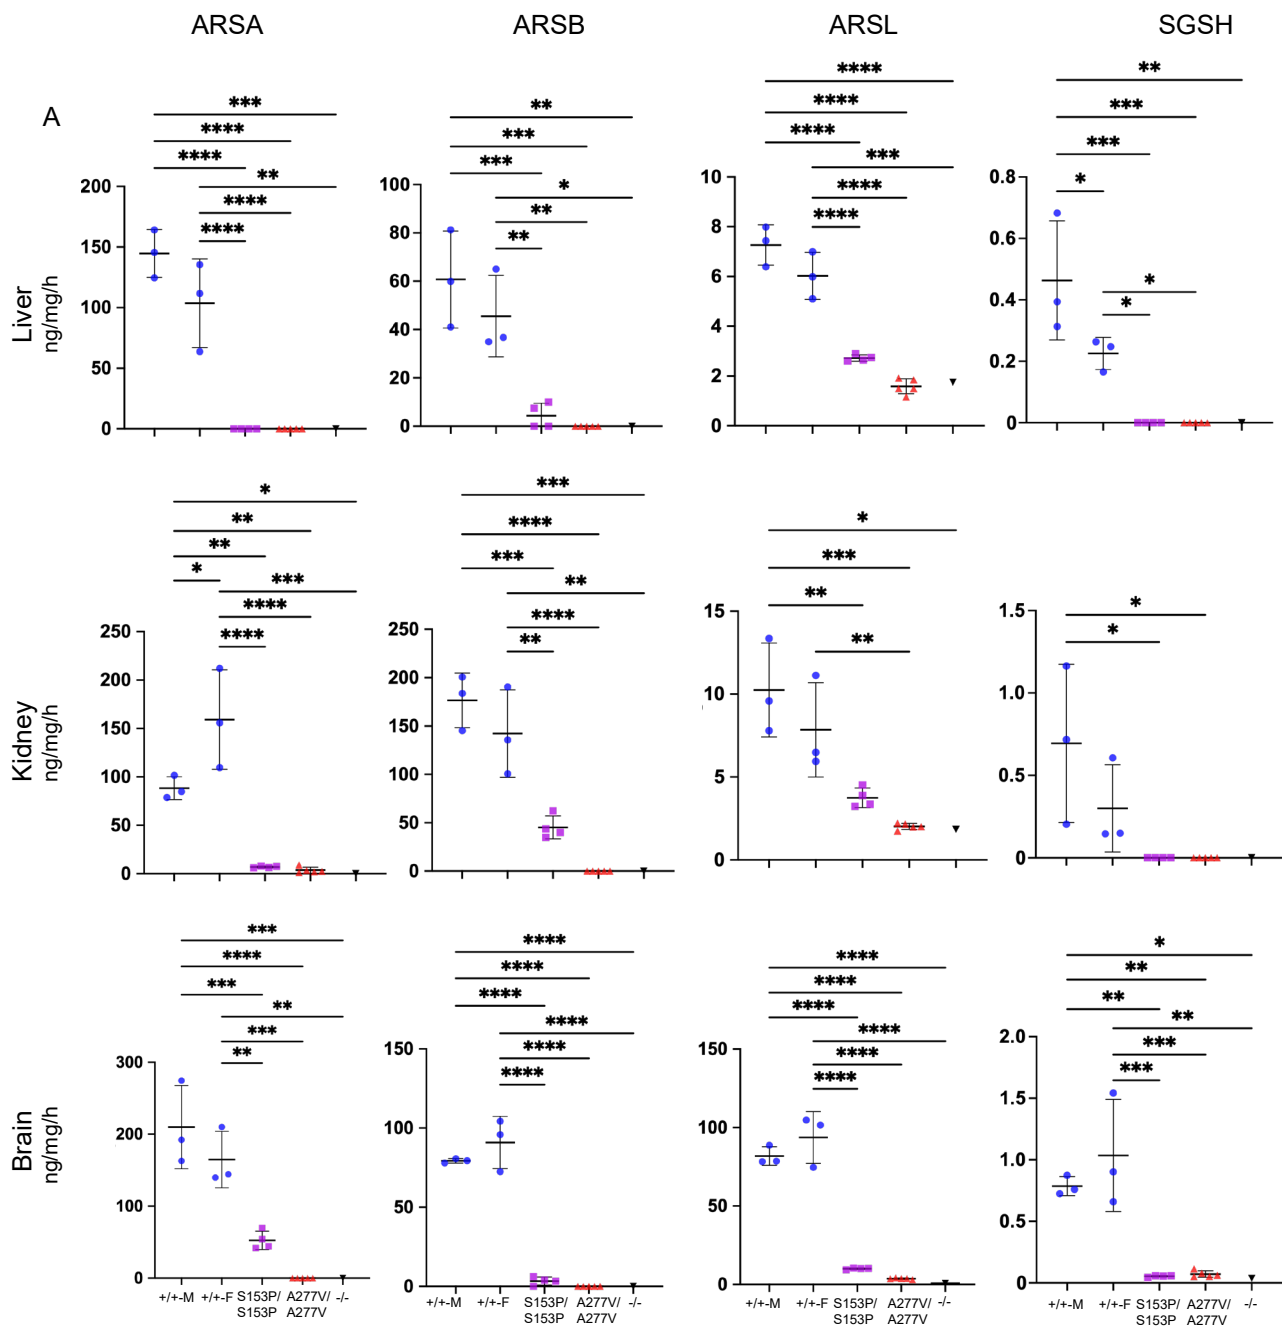

Supp. Figure 5

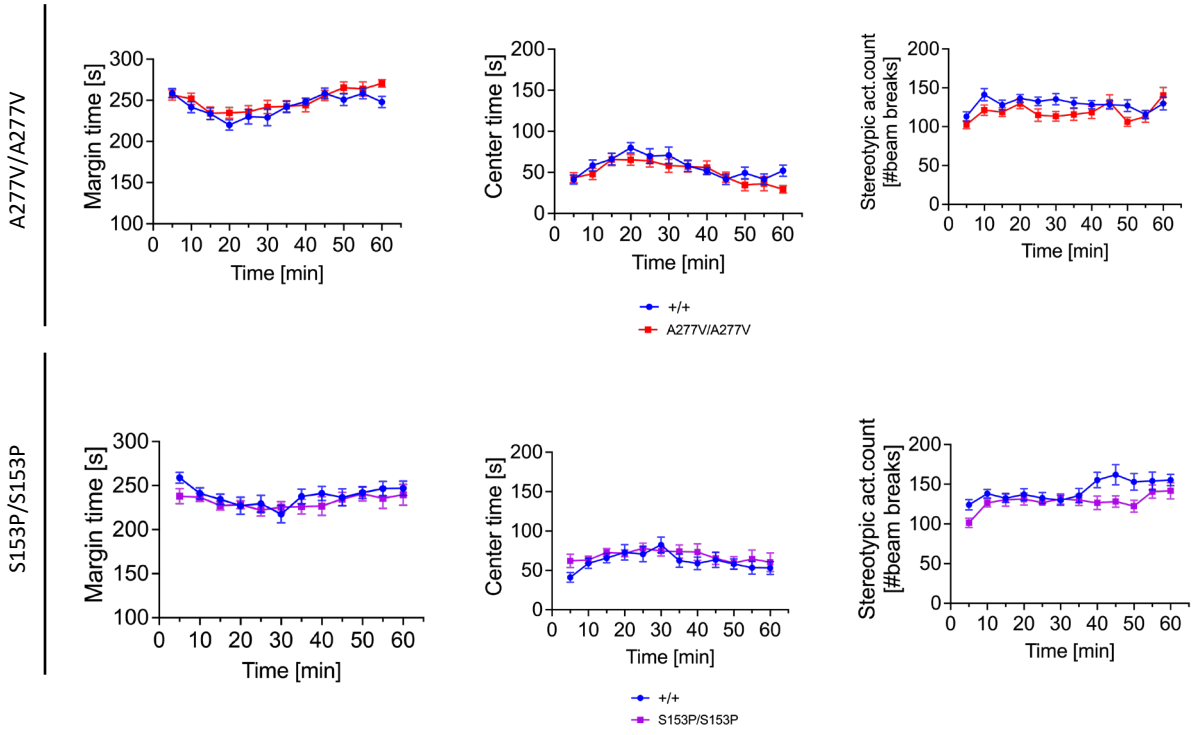

Supp. Figure 6

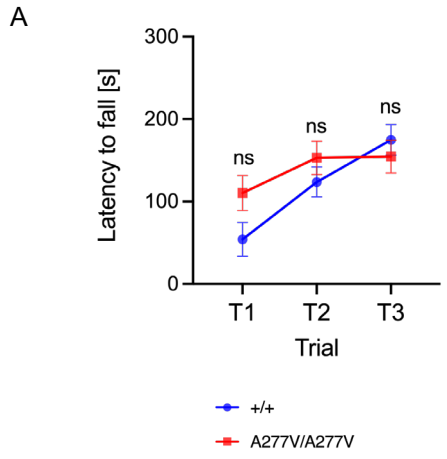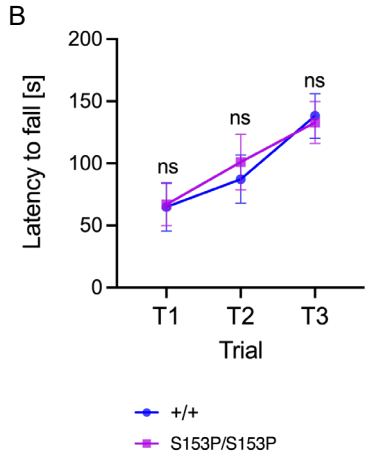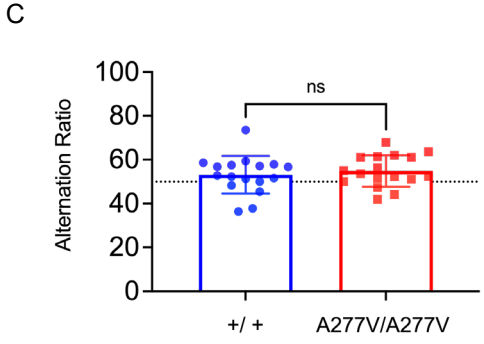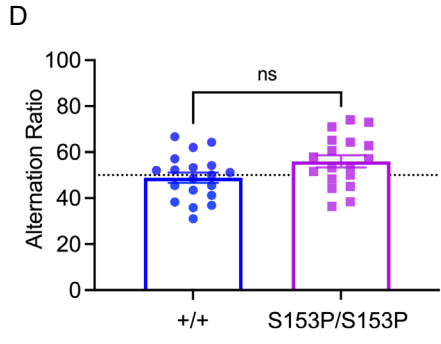

Supplement: NIHMS1953976-supplement-1.pdf [file NIHMS1953976-supplement-1.pdf]
